# Supplementary material for: Efficient calculation of carrier scattering rates from first principles
Source: PubMed Central journal article supplement (PMC8044096; doi:10.1038/s41467-021-22440-5), 2021-04-13
Supplement: 41467_2021_22440_MOESM2_ESM.pdf [file 41467_2021_22440_MOESM2_ESM.pdf]

## **Description of Additional Supplementary Files**

Supplementary Software 1

AMSET software used to calculate all results in the main text.
